# Supplementary material for: Aqueous-solution-processed PPV–CdxHg1−xTe hybrid solar cells with a significant near-infrared contribution
Source: Royal Society of Chemistry journal article supplement (doi:10.1039/c2jm33958g), 2012-01-01
Supplement: c2jm33958g.pdf [file c2jm33958g.pdf]

## Supporting Information

### Aqueous-solution-processed $\text{PPV-Cd}_x\text{Hg}_{1-x}\text{Te}$ Hybrid Solar Cells with Significant Near-infrared Contribution†

Haotong Wei, Hao Zhang, Haizhu Sun, Weili Yu, Yi Liu, Zhaolai Chen, Liying Cui, Wenjing Tian and Bai Yang\*

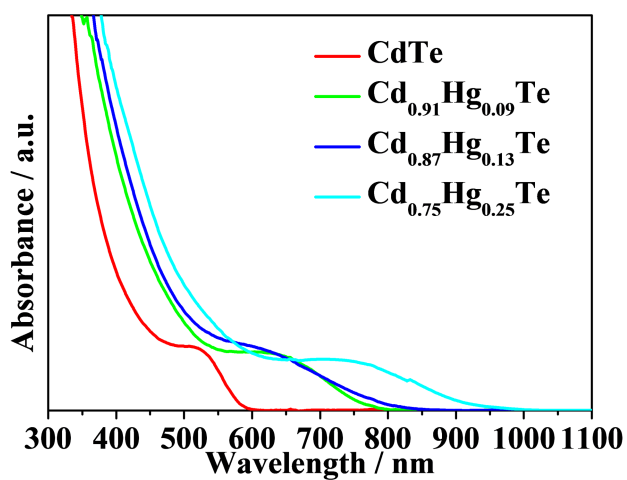

**Figure S1.** The absorption of the NCs with different Cd/Hg ratios.
